# Supplementary material
Source: Springer Nature journal article supplement (https://www.springermedizin.de/resource/supplementary/12931_2011_1206_MOESM3_ESM.pdf/9425762)

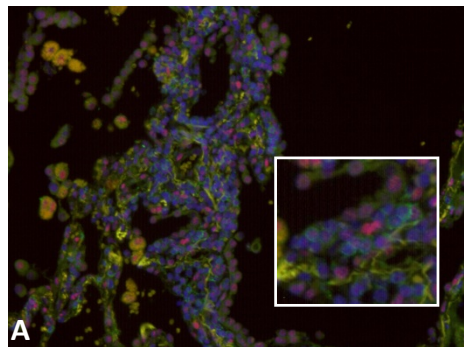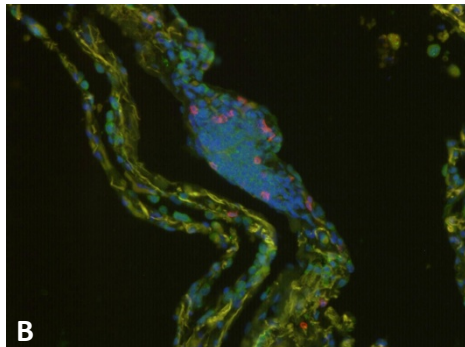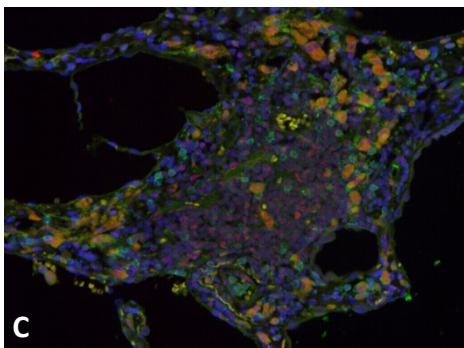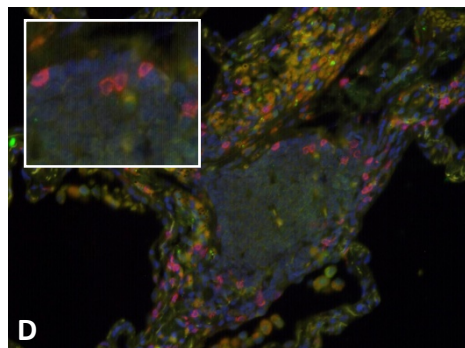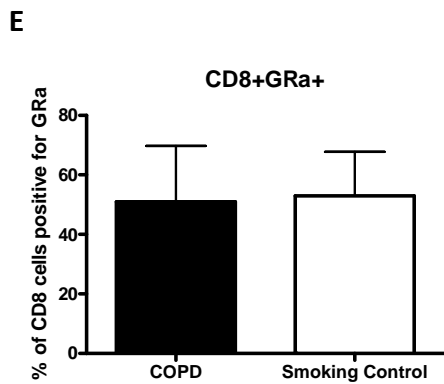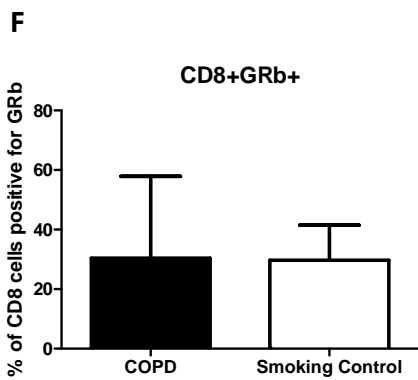

Supplement: MOESM3 [file 9425762]
